# Supplementary material
Source: Research Square preprint supplement (doi:10.21203/rs.3.rs-9176742/v1)
Supplement: Supplementary file 1 [file 541d7d844ca629a5c3ddef8e.docx]

**Supplementary**

Supplementary figure 1

| 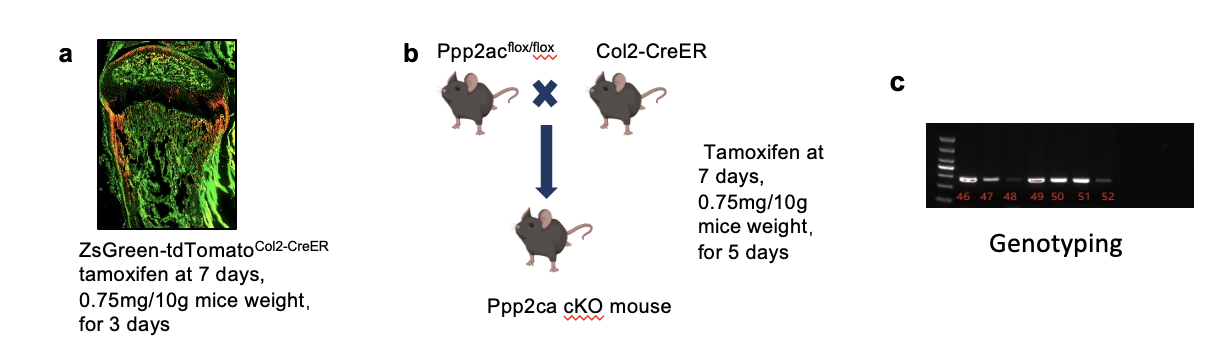 |
| --- |
| **Fig. S1 Generation of chondrocyte-specific *Ppp2ca* knockout mice.** (a)Lineage tracing of Col2-expressing cells in joint tissues, demonstrating chondrocyte-specific localization. (b) Breeding scheme for generating conditional *Ppp2ca* knockout (KO) (*Col2CreER;Ppp2caf/f*) mice. (c) Genotyping confirming successful *Ppp2ca* chondrocyte-specific KO animals. |

| 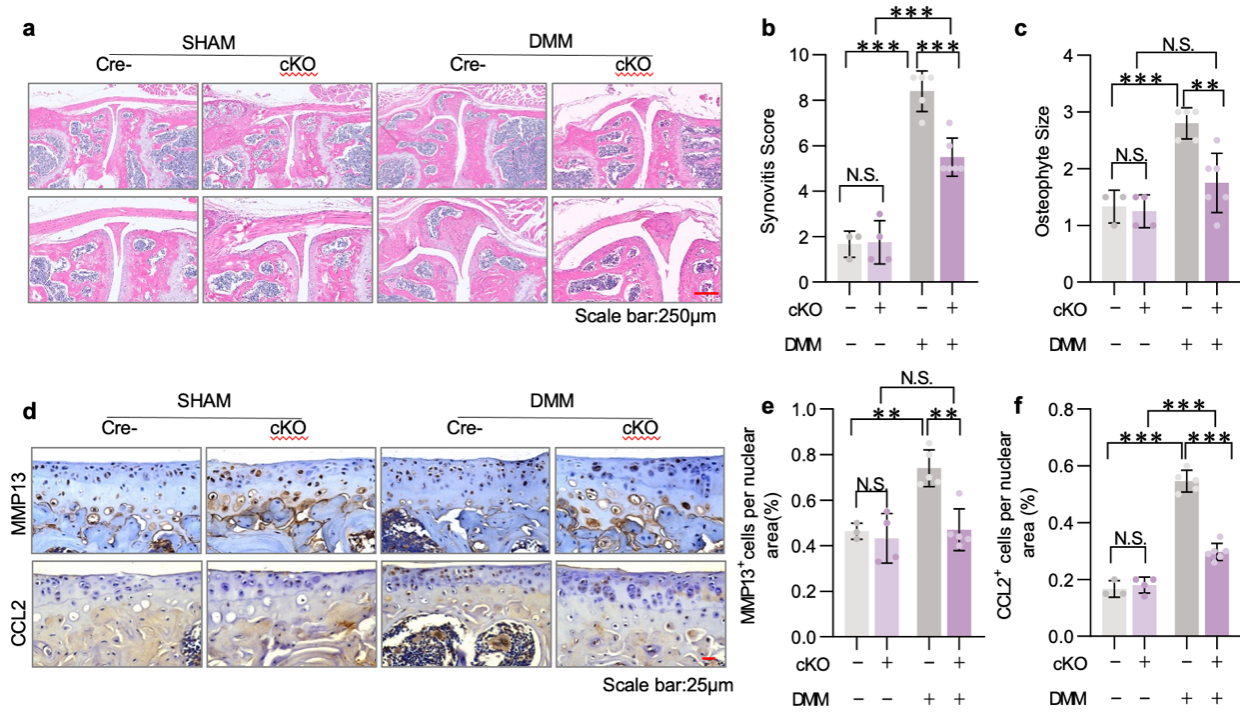 |
| --- |
| 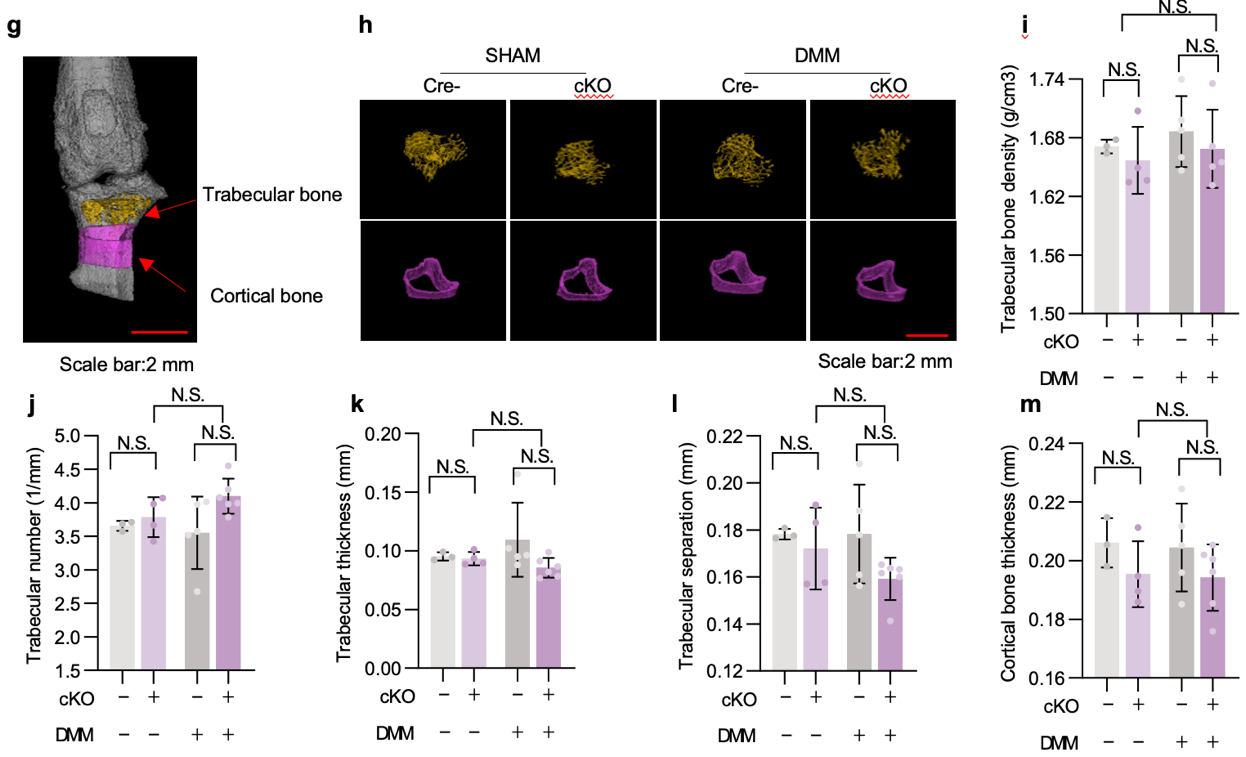 |
| **Fig. S2 Micro-CT imaging and histopathological analysis *Ppp2ca* cKO mice with DMM surgery.** (a) Representative H&E-stained joint sections (scale bar: 250 μm) and quantitative analysis of (b) synovitis scores and (c) osteophyte size in Sham or DMM-operated control (Cre-) and *Ppp2ca* cKO mice (n≥3). (d-f) Immunohistochemical evaluation showing (d) representative sections (scale bar: 25 μm) with quantification of (e) MMP13+ and (f) CCL2+ chondrocytes (n≥3). (g) Micro-CT reconstructions of trabecular and cortical bone architecture (scale bar: 2 mm) with corresponding quantification of (h) trabecular bone mineral density (BMD), (i) trabecular number (Tb.N), (j) trabecular thickness (Tb.Th), (k) trabecular separation (Tb.Sp), and (l) cortical thickness (Ct.Th) (n≥3). Data represent mean ± SD. Statistical analysis was performed by two-way ANOVA followed by the Tukey post-hoc test ; **P* < 0.05, ***P* < 0.01, ****P* < 0.001 were considered as statistically significant, N.S., not significant. |
| 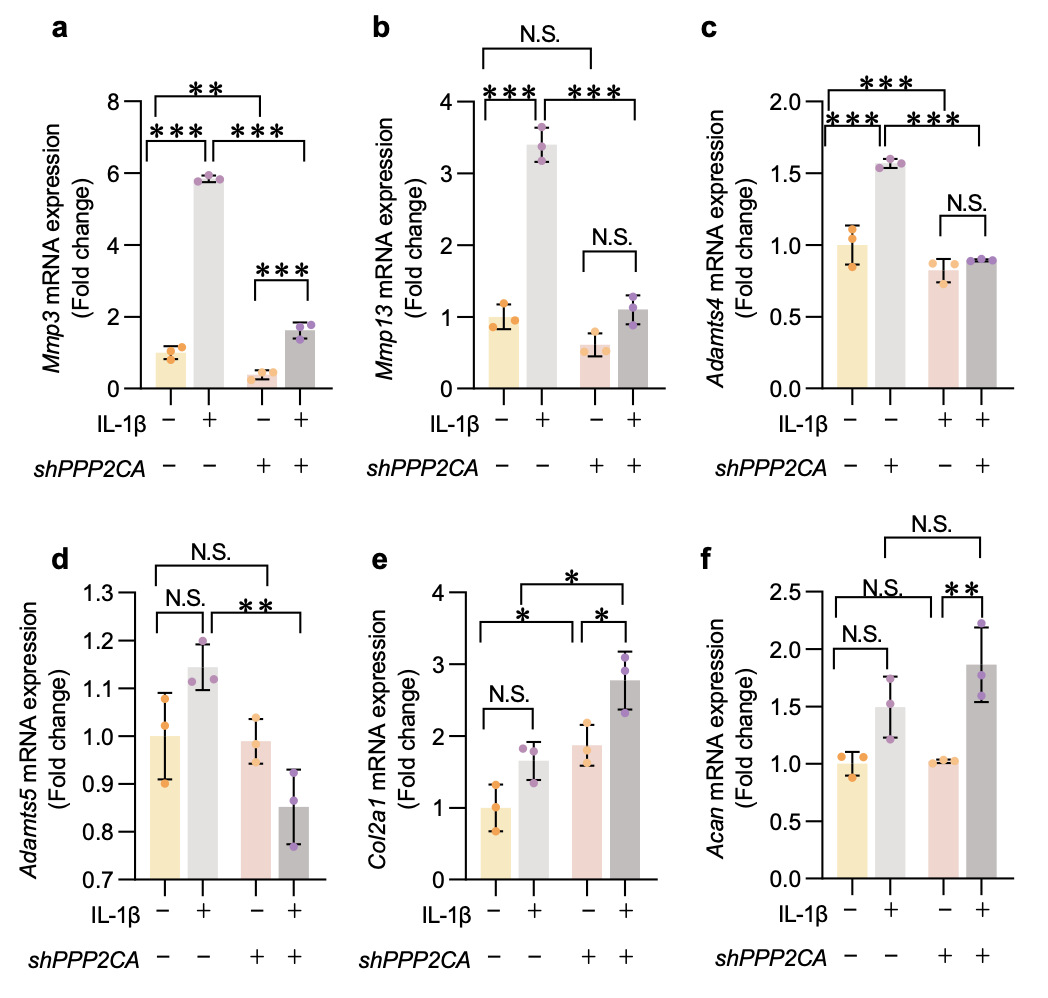 |
| **Fig. S3 PPP2CA knockdown modulates extracellular matrix gene expression in ATDC5 chondrocytes.** Quantitative PCR analysis of (a) *Mmp3*, (b) *Mmp13*, (c) *Adamts4*, (d) *Adamts5*, (e) *Col2a1*, and (f) *Acan*mRNA levels in ATDC5 cells following PPP2CA knockdown (n=3). Data represent mean ± SD. Statistical analysis was performed by two-way ANOVA followed by the Tukey post-hoc test ; **P* < 0.05, ***P* < 0.01, ****P* < 0.001 were considered as statistically significant, N.S., not significant. |

| 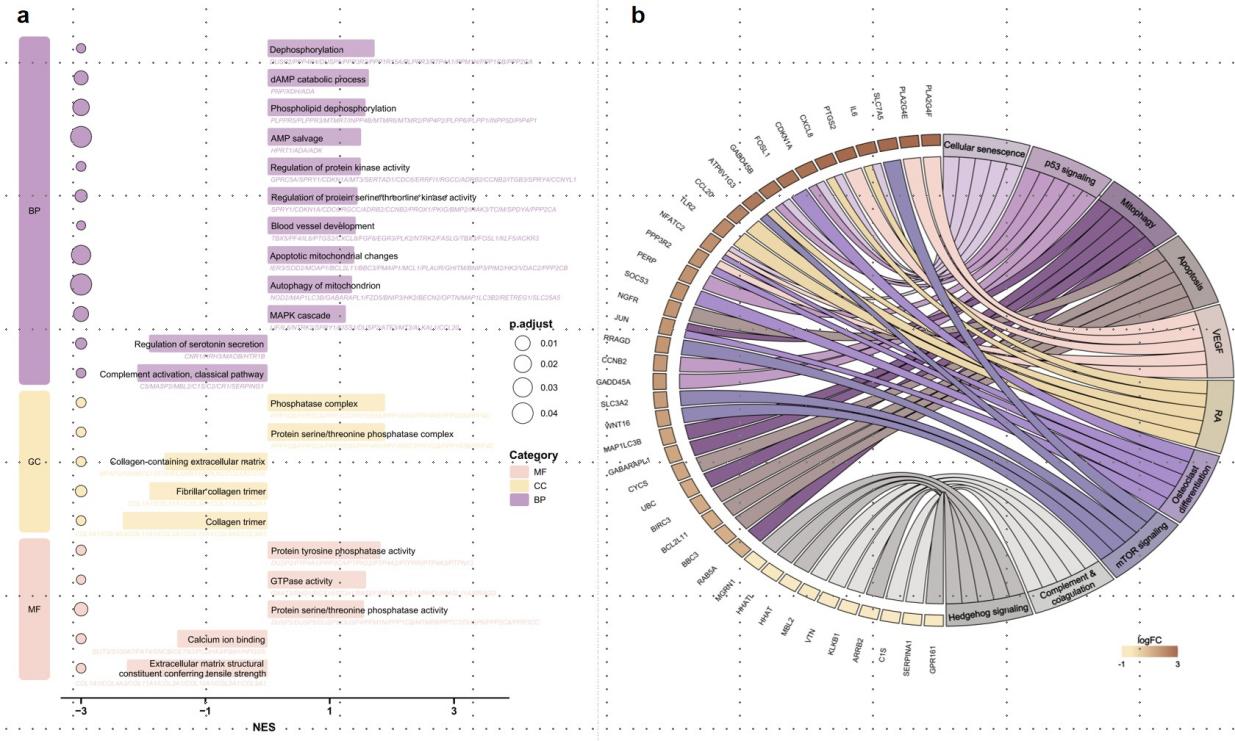 |
| --- |
| **Fig. S4 Functional annotation analyses of PPP2CA.** (a) Gene ontology (GO) analysis of top cellular functions in OA cartilage with high versus low PPP2CA expression (E-MTAB-4304 v.s. GSE114007). (b) Top enriched pathways and associated genes in high-PPP2CA expressing OA cartilage (KEGG). |

| **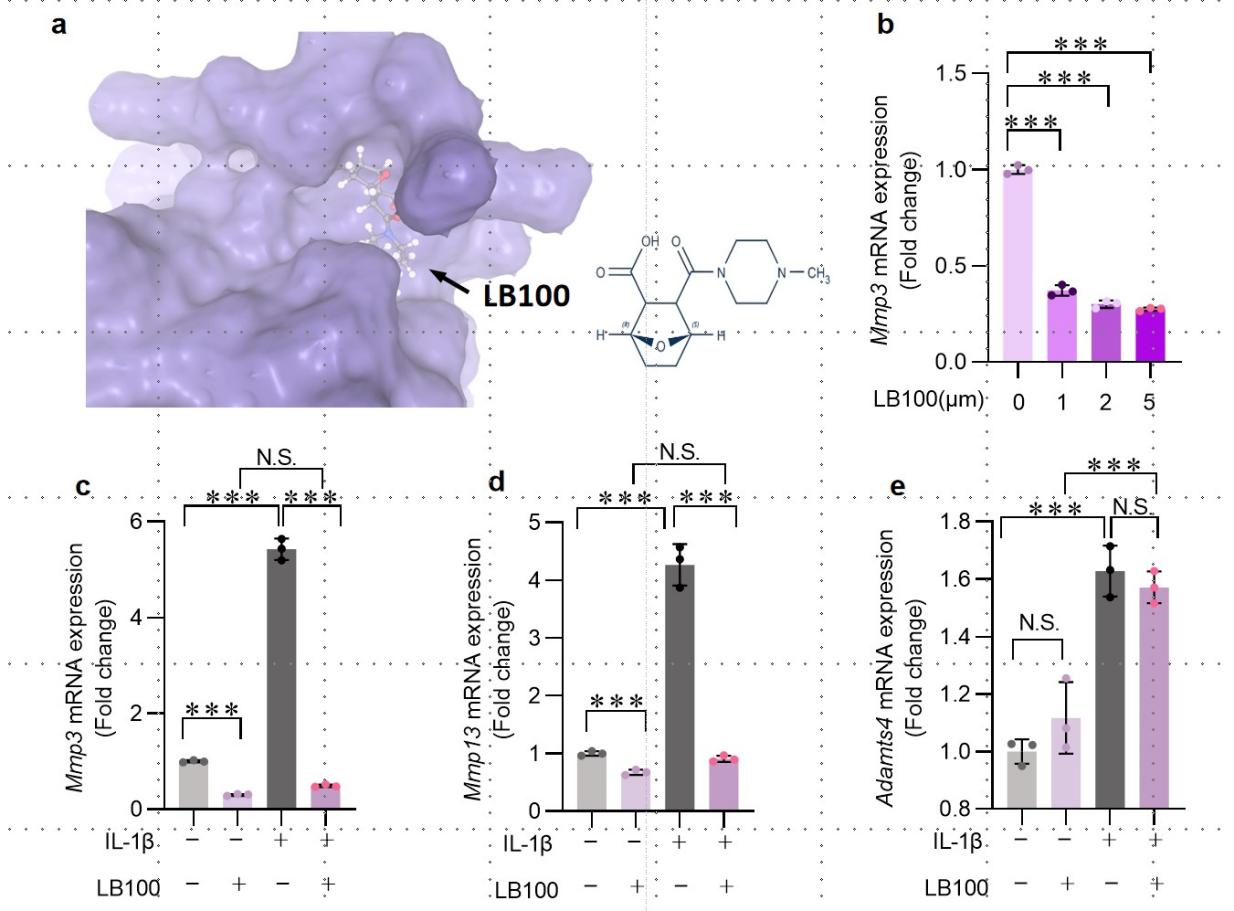** |
| --- |
| **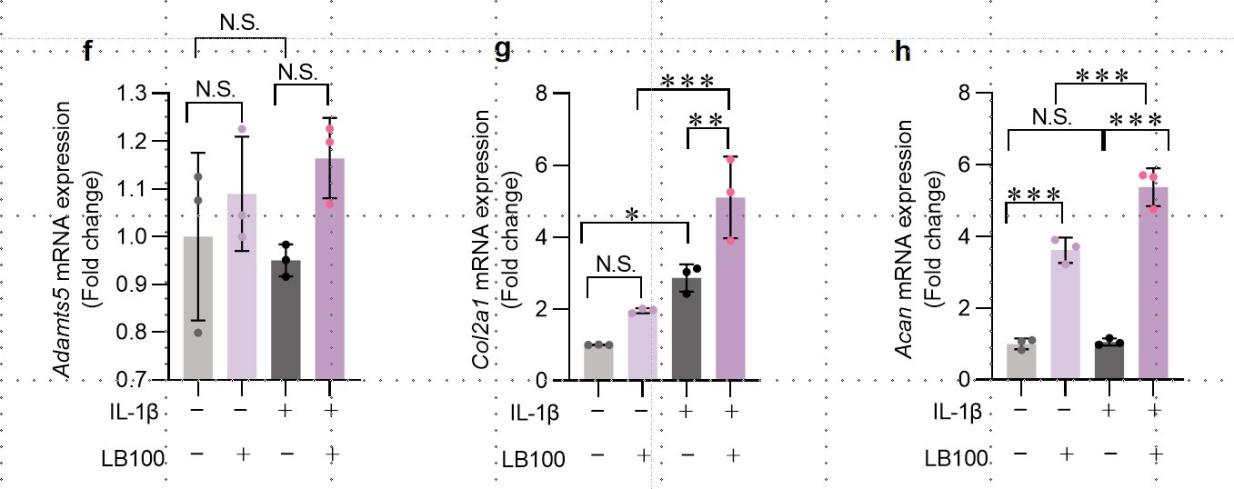** |
| **Fig. S5 LB-100 modulates ECM gene expression in ATDC5.** (a) The SWISS-Dock model estimates high binding affinity between LB-100 and PPP2CA (AC score: -23.235179). (b) Dose-response analysis of *Mmp3* expression in ATDC5 cells treated with increasing concentrations of LB-100 (0-5 μM). (c-h) qPCR analysis of extracellular matrix-related genes in IL-1β-stimulated ATDC5 cells with or without LB-100 treatment (2 μM): (c) *Mmp3*, (d) *Mmp13*, (e) *Adamts4*, (f) *Adamts5*, (g) *Col2a1*, and (h) *Acan* (n=3). Data represent mean ± SD. Statistical analysis was performed by two-way ANOVA followed by the Tukey post-hoc test ; **P* < 0.05, ***P* < 0.01, ****P* < 0.001 were considered as statistically significant; N.S., not significant. |

| **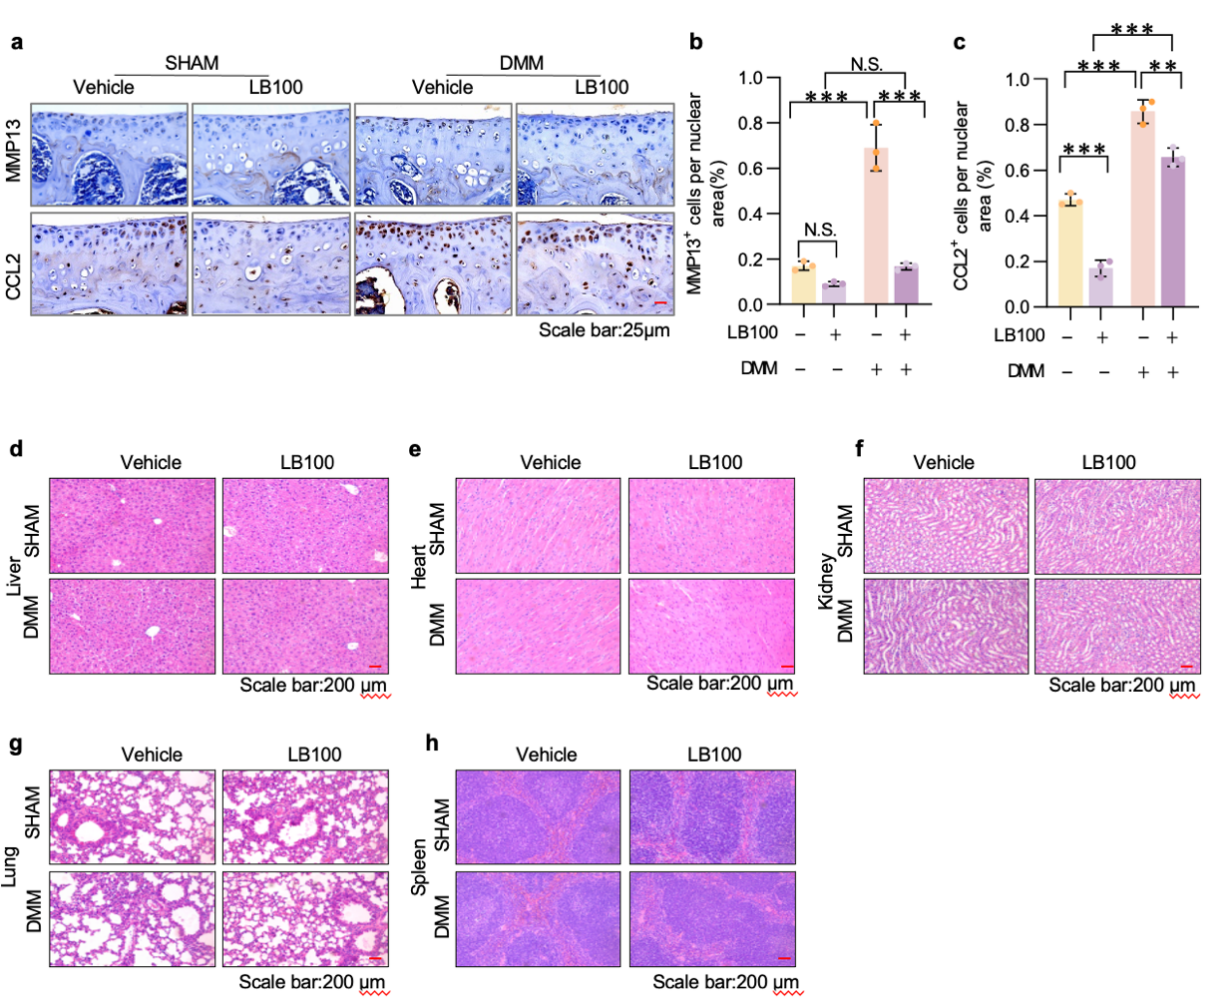** |
| --- |
| **Fig. S6 Safety evaluation of YC-LB-100 treatment in OA mice.** (a) Representative immunohistochemical images (scale bar: 25 μm) and quantitative analysis of (b) MMP13+ and (c) CCL2+ cells in articular cartilage of wild-type (WT) and DMM-operated mice treated with vehicle or YC-LB-100 (n≥3). (d-h) Hematoxylin and eosin (H&E)-stained sections of (d) liver, (e) heart, (f) kidney, (g) lung, and (h) spleen from treated mice, demonstrating no pathological alterations. Data represent mean ± SD. Statistical analysis was performed by two-way ANOVA followed by the Tukey post-hoc test ; **P* < 0.05, ***P* < 0.01, ****P* < 0.001 were considered as statistically significant; N.S., not significant. (i) In vivo fluorescence imaging tracking NCG-NPs following oral administration. |
