# Supplementary material
Source: Research Square preprint supplement (doi:10.21203/rs.3.rs-9176742/v1)
Supplement: Supplementary file 2 [file dd1a50b4b4ea04aae214d126.docx]

**Table S1**. Concentrations and dilutions of antibodies used in this study

| **Antibodies** | **Source (Identifiers)** | **Method** | **Dilutions** |
| --- | --- | --- | --- |
| PPP2CA | Proteintech(13482-1-AP) | WB | 1：1000 |
| Abcam(ab32065) | IHC | 1:50 |
| ADAMTS5 | SAB(YB-31158) | IHC | 1:50 |
| ACAN | Proteintech(13880-1-AP) | IHC | 1:200 |
| MMP13 | Proteintech(18165-1-AP) | IHC | 1:200 |
| CCL2 | NOVUS BIO(NBP1-07035) | IHC | 1:200 |
| AMPK | Abcam(ab23875) | IHC | 1:100 |
| P-AMPK | ABWAYS (CY6027) | IHC | 1：50 |
| SDHA | HUABIO(ET1703-40) | WB | 1：500 |
| UQCRC1 | Proteintech(21705-1-AP) | WB | 1：1000 |
| COX4I2 | Proteintech(11463-1-AP) | WB | 1：500 |
| MT-ND4 | SAB(YB30241) | WB | 1：500 |
| ATP5A | Proteintech(66037-1-Ig) | WB | 1：5000 |
| α-Tubulin | Proteintech(11224-1-AP) | WB | 1：3000 |
| β-actin | Proteintech(66009-1-IG) | WB | 1：20000 |

**Table S2**. The sequences of primers used in this study

| **Genes** | **Primer sequence (forward primers)** | **Primer sequence (reverse primers)** |
| --- | --- | --- |
| *Mmp3* | ACATGGAGACTTTGTCCCTTTTG | TTGGCTGAGTGGTAGAGTCCC |
| *Mmp13* | CTTCTTCTTGTTGAGCTGGACTC | CTGTGGAGGTCACTGTAGACT |
| *Adamts4* | ATGGCCTCAATCCATCCCAG | AAGCAGGGTTGGAATCTTTGC |
| *Adamts5* | GGAGCGAGGCCATTTACAAC | CGTAGACAAGGTAGCCCACTTT |
| *Col-2a1* | GGGAATGTCCTCTGCGATGAC | CAGGCGCACCATCTCTGAT |
| *β-Actin* | GGCTGTATTCCCCTCCATCG | CCAGTTGGTAACAATGCCATGT |
| *Acan* | CCTGCTACTTCATCGACCCC | AGATGCTGTTGACTCGAACCT |
| *Glut4* | GTGACTGGAACACTGGTCCTA | CCAGCCACGTTGCATTGTAG |
| *Pparα* | AGAGCCCCATCTGTCCTCTC | ACTGGTAGTCTGCAAAACCAAA |
| *Mtor* | ACCGGCACACATTTGAAGAAG | CTCGTTGAGGATCAGCAAGG |
| *Hif1α* | ACCTTCATCGGAAACTCCAAAG | CTGTTAGGCTGGGAAAAGTTAGG |
| *Pgc1α* | TATGGAGTGACATAGAGTGTGCT | CCACTTCAATCCACCCAGAAAG |
